# Supplementary material for: A rapid transfer of virions coated with heparan sulfate from the ECM to CD151 defines an early step in the human papillomavirus infection cascade
Source: eLife. 2026 Jun 16;14:RP107139. doi: 10.7554/eLife.107139 (PMC13271742; doi:10.7554/eLife.107139)
Supplement: Source data 1. [file elife-107139-data1.xlsx]

## Sheet: Figure 1
Fig. 1C					Fig. 1D											Fig. 1E
Control	CytD	CytD after 1 h			spot intensity [a.u.]	Control			CytD			CytD after 1 h				Control 5 h	CytD 5 h	Control 24 h	CytD 24 h
103.79	147.58	122.404			10	0	0	0	0	0	0	0	0	0		100	64.7393	157.961	2.86621
91.082	126.131	127.481			20	0	0	0	0	0	0	0	0	0		100	60.313	148.688	0.6532
102.851	146.231	90.6543			30	0.185598	0.243478	0.0730994	0.0602289	0.0840336	0.0360231	0.0288684	0.334896	0		100	89.2184	149.344	1.28187
					40	1.41054	0.173913	0.852827	0.381449	4.11765	4.89914	0.51963	0.87073	10.8434
					50	2.82108	1.21739	1.85185	0.782975	4.95798	7.31268	1.38568	1.20563	15.1205
					60	2.30141	3.02609	1.36452	1.20458	2.18487	3.85447	2.13626	0.602813	7.59036
					70	2.74684	9.8087	2.82651	2.75045	1.2605	1.83718	2.56928	0.669792	3.9759
					80	5.41945	22.087	7.43177	3.83457	2.10084	1.51297	5.02309	1.74146	2.22892
					90	9.24276	22.8174	10.5507	4.63762	2.60504	1.29683	10.4215	5.69323	3.25301
					100	12.6206	16	11.501	6.44449	4.03361	1.80115	13.9434	11.7214	5.30121
					110	13.5858	8.34783	10.5263	7.12708	5.12605	2.48559	12.3557	12.1232	7.10843
					120	13.9941	6.9913	8.82066	8.2112	5.96639	4.17867	10.5947	13.1279	6.14458
					130	12.5093	3.89565	7.94347	7.24754	6.21849	7.38473	8.94919	10.8506	6.44578
					140	8.12918	1.77391	6.28655	6.6051	4.78992	6.73631	6.55312	7.76959	5.72289
					150	4.41722	1.70435	5.31189	5.76189	5.12605	7.20461	4.84988	4.75553	3.6747
					160	2.44989	0.486957	5.33626	5.19976	3.10924	7.52882	3.3776	3.81782	4.03615
					170	1.7075	0.486957	4.04483	4.35656	4.70588	5.04323	3.11778	2.94709	2.71084
					180	1.5219	0.278261	3.72807	3.77434	3.44538	4.10663	2.59815	3.34896	2.46988
					190	1.15071	0.173913	2.97271	4.11564	3.61345	3.35014	2.07852	2.47823	2.22892
					200	0.890869	0.173913	2.04678	3.15198	3.78151	3.35014	1.93418	1.9424	2.10843
					210	1.03935	0.13913	1.48636	2.56976	2.68908	2.37752	1.67437	2.14334	1.80723
					220	0.668151	0.0695652	1.36452	2.52961	2.10084	2.88184	1.097	1.54052	1.44578
					230	0.445434	0	1.02339	2.42923	2.68908	2.52161	1.35681	1.80844	1.3253
					240	0.185598	0	0.633528	1.90725	2.35294	2.23343	0.663972	1.80844	0.843373
					250	0.111359	0	0.511696	2.00763	2.18487	1.83718	0.375289	1.00469	0.662651
					260	0.185598	0	0.341131	1.66633	2.35294	1.90922	0.548499	1.07167	0.60241
					270	0.148478	0.0347826	0.292398	1.44549	2.01681	1.36888	0.404157	0.803751	0.301205
					280	0.0371195	0.0347826	0.243665	1.50572	2.35294	1.26081	0.433025	0.937709	0.481928
					290	0	0	0.194932	1.22465	1.84874	1.33285	0.34642	0.468855	0.180723
					300	0.0371195	0	0.0974659	0.983738	2.18487	1.15274	0.115473	0.535834	0.301205
					310	0	0	0.0974659	0.823128	1.5126	0.972622	0.17321	0.401875	0.361446
					320	0	0	0	0.722746	1.2605	1.11671	0.144342	0.401875	0.180723
					330	0	0	0.0974659	0.642441	0.672269	0.684438	0.0288684	0.200938	0.240964
					340	0	0	0.0974659	0.642441	1.17647	0.540346	0.0866051	0.334896	0.060241
					350	0	0	0	0.441678	0.588235	0.432277	0.0288684	0.0669792	0.060241
					360	0	0	0.0243665	0.421602	0.504202	0.756484	0.0288684	0.0669792	0
					370	0	0	0	0.341297	0.504202	0.432277	0	0.0669792	0.120482
					380	0	0	0.0243665	0.140534	0.336135	0.288184	0	0.200938	0
					390	0	0	0	0.321221	0.672269	0.324207	0	0.0669792	0
					400	0	0	0	0.301144	0.420168	0.0360231	0	0	0
					410	0	0	0	0.100381	0.756302	0.180115	0	0.0669792	0.060241
					420	0.0371195	0	0	0.180687	0.168067	0.252161	0	0	0
					430	0	0	0	0.16061	0	0.0720461	0	0	0
					440	0	0	0	0.16061	0.0840336	0.0720461	0	0	0
					450	0	0	0	0.16061	0.336135	0.0720461	0.0288684	0	0
					460	0	0	0	0.180687	0.252101	0	0	0	0
					470	0	0	0	0.0602289	0.168067	0.216138	0	0	0
					480	0	0	0	0.0200763	0	0	0	0	0
					490	0	0	0	0.0602289	0.0840336	0.144092	0	0	0
					500	0	0	0	0.0602289	0	0.0360231	0	0	0
												0	0	0
												0	0	0
												0	0	0
												0	0	0
												0	0	0
												0	0	0
												0.0288684	0	0
												0	0	0
												0	0	0
												0	0	0
												0	0	0
												0	0	0
												0	0	0
												0	0	0
												0	0	0
												0	0	0
												0	0	0
												0	0	0
												0	0	0
												0	0	0
												0	0	0
												0	0	0
												0	0	0
												0	0	0
												0	0	0
												0	0	0
												0	0	0
												0	0	0
												0	0	0
												0	0	0
												0	0	0

## Sheet: Figure 2
Fig. 2C
[min]	Control			Leupeptin			Furin inhibitor I
0	-0.02871	-0.07106	-0.03866	-0.04013	0.003395	-0.08658	-0.05155	-0.05555	-0.07363
30	0.012478	0.026568	0.063639	-0.04646	-0.03981	-0.03184	-0.02426	0.031628	-0.00261
60	0.077055	0.107063	0.074834	-0.04476	-0.0045	-0.09644	0.072249	0.072745	0.016462

## Sheet: Figure 3
Fig. 3B
no PsVs		PsVs
Control	CytD	Control	CytD
32.557	35.7332	47.3141	57.8648
45.9232	48.6612	41.3218	81.9432
39.4728	37.1073	43.0241	60.2811

## Sheet: Figure 3-figure supplement 1
Figure 3-figure supplement 1B
[min]	Control			CytD
0	1.90091	0.982722	1.60838	1.72079	0.745323	1.58748
30	2.2967	1.91019	3.1319	1.83829	2.17194	1.91856
60	2.51598	1.99723	1.98127	1.90889	0.010881	1.58727
180	1.39399	3.23238	2.30031	1.84593	2.46594	3.51494

## Sheet: Figure 4
Fig. 4B
time [min]	Control			CytD
0	2.60977	2.43441	5.28407	14.1844	21.4835	28.5677
15	3.30537	3.24977	9.05753	6.75402	7.72012	16.6129
30	4.98703	4.35087	6.0762	4.51353	7.44544	8.95655
60	3.21478	3.68236	6.63725	3.19339	6.82254	7.8602

## Sheet: Figure 5
Fig. 5B								Fig. 5C								Fig. 5D
[min]	DMSO			CytD				[min]	DMSO			CytD				[min]	DMSO			CytD
0	17.5616	13.0675	13.0225	15.3829	27.5403	14.5091		0	0.17937	0.074868	0.112149	-0.01604	-0.07709	0.013803		0	7.96726	8.42933	9.62097	9.68984	0.032263	6.65035
30	24.81	27.387	19.0365	10.5198	19.2752	16.112		30	0.105367	0.095789	0.163311	0.146261	0.045272	0.140818		30	18.9118	3.30768	12.0108	10.7142	2.92998	9.5407
60	13.2471	12.6606	17.0623	9.29043	12.702	10.4236		60	0.073732	0.110546	0.116418	0.130774	0.069875	0.070323		60	8.94563	7.8506	9.28287	16.3993	10.2304	11.3555
180	15.506	18.8806	14.7945	9.24097	5.21759	11.7054		180	0.114876	0.124136	0.145308	0.144502	0.131821	0.120594		180	14.1969	10.0276	13.627	6.62446	10.5058	6.38392

## Sheet: Figure 5-figure supplement 1
Figure 5-figure supplement 1C
[min]	DMSO			CytD
0	19.0674	6.0959	15.1235	38.8318	36.145	34.5361
30	13.0785	9.52451	14.1545	30.6661	23.3392	20.9134
60	11.6067	10.6734	12.8478	14.1578	18.3809	18.2684
180	6.38812	8.36078	8.13464	14.323	14.7538	7.96596

## Sheet: Figure 5-figure supplement 4
Figure 5-figure supplement 4B								Figure 5-figure supplement 4C
[min]	original			flipped				[min]	original			flipped
0	0.17937	0.074868	0.112149	-0.06965	0.011944	-0.03436		0	-0.01604	-0.07709	0.013803	0.013117	0.049453	-0.03885
30	0.105367	0.095789	0.163311	-0.01911	-0.00013	-0.02417		30	0.146261	0.045272	0.140818	-0.05037	0.057848	-0.02806
60	0.073732	0.110546	0.116418	0.003558	-0.03006	-0.04426		60	0.130774	0.069875	0.070323	-0.01639	-0.00249	-0.01633
180	0.114876	0.124136	0.145308	0.003819	-0.05139	-0.03659		180	0.144502	0.131821	0.120594	-0.04119	-0.01243	-0.02014

## Sheet: Figure 5-figure supplement 5
Figure 5-figure supplement 5A								Figure 5-figure supplement 5B								Figure 5-figure supplement 5D
	DMSO			CytD					DMSO			CytD
	n1	n2	n3	n1	n2	n3			n1	n2	n3	n1	n2	n3		re-attached cells
0	0.626138	0.236248	0.370634	0.220305	0.0680917	0.122178		0	0.253024	0.508768	0.901361	0.156105	0.0678134	0.0870996		[maxima/µ^2]	wash
30	0.21874	0.588348	0.490751	0.273179	0.597914	0.39935		30	0.489758	0.460167	0.418734	0.276381	0.257506	0.291494		n1	2.04353
60	0.564367	0.572491	0.593371	0.261073	0.134635	0.155762		60	0.375466	0.396308	0.468115	0.199202	0.586594	0.461341		n2	1.49523
180	0.351692	0.516336	0.732719	0.239271	0.829291	0.385122		180	0.284015	0.634111	0.598544	0.685064	0.707742	0.41009		n3	1.54628

## Sheet: Figure 5-figure supplement 6
Figure 5-figure supplement 6A								Figure 5-figure supplement 6B								Figure 5-figure supplement 6C			Figure 5-figure supplement 6D								Figure 5-figure supplement 6E
[min]	original			flipped				[min]	original			flipped				CD151 maxima density [1/μm2]	fraction [%]		[min]	original			flipped				[min]	original			flipped
0	23.5917	27.1084	28.1075	16.0464	21.9277	17.1893		0	24.7887	21.3836	24.4094	16.0916	24.7642	14.3122		7.40142	16.0916		0	7.96726	8.42933	9.62097	0.422022	3.24861	-1.29728		0	9.68984	0.032263	6.65035	0.992652	3.41277	-3.44692
30	40.5731	25.7421	32.6693	20.8145	24.565	20.5843		30	25.2033	20.8565	26.5044	14.1309	18.6989	14.4235		10.4664	24.7642		30	18.9118	3.30768	12.0108	-0.84687	2.13061	-0.07414		30	10.7142	2.92998	9.5407	-0.35822	0.772417	-2.54015
60	24.8806	25.8212	30.6334	17.1081	18.3784	20.0384		60	30.7886	26.8613	27.1728	15.1846	13.8686	15.4845		8.70544	14.3122		60	8.94563	7.8506	9.28287	1.17316	0.407777	-1.31214		60	16.3993	10.2304	11.3555	0.795236	-2.76227	-0.33279
180	33.9458	32.4449	31.9259	19.3424	22.6103	19.0525		180	15.3504	18.6128	20.4945	6.56285	7.72608	12.622		7.10249	14.1309		180	14.1969	10.0276	13.627	-0.40653	0.193053	0.753701		180	6.62446	10.5058	6.38392	-2.16308	-0.38092	-1.48855
																8.7875	18.6989
																8.31552	14.4235
																7.05359	15.1846
																8.1524	13.8686
																7.75358	15.4845
																4.27741	6.56285
																3.97402	7.72608
																6.91693	12.622
																7.65902	16.0464
																9.15642	21.9277
																9.06202	17.1893
																10.6183	20.8145
																10.9972	24.565
																10.1267	20.5843
																7.81125	17.1081
																8.80912	18.3784
																10.4659	20.0384
																9.68083	19.3424
																10.9888	22.6103
																8.97001	19.0525

[truncated: 7 more sheets: Figure 6, Figure 6-figure supplement 1, Figure 6-figure supplement 2, Figure 7, Figure 8, Figure 8-figure supplement 1, Figure 8-figure supplement 2]
